# Supplementary material for: Cohort profile: Genetic data in the German Socio-Economic Panel Innovation Sample (SOEP-G)
Source: PubMed Central journal article supplement (PMC10686514; doi:10.1371/journal.pone.0294896), 2023-11-29
Supplement: pone.0294896.s002.pdf [file pone.0294896.s002.pdf]

**S2 Fig.** Histogram of genotype call rates of SNPs and samples

**A.** SNP call rates

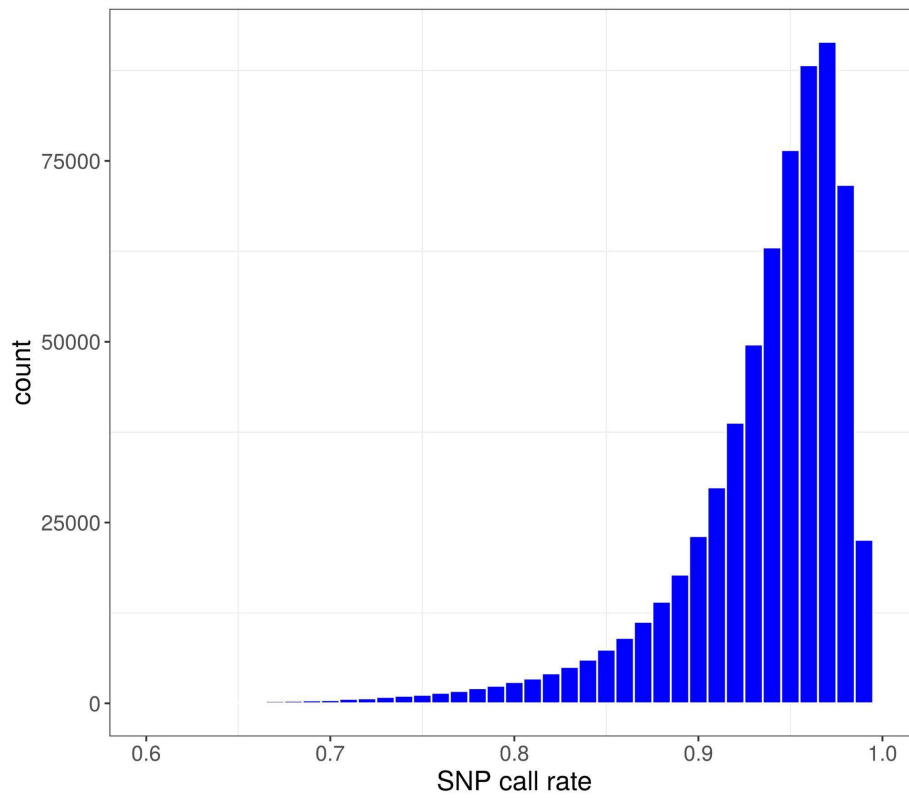

**B.** Sample call rates

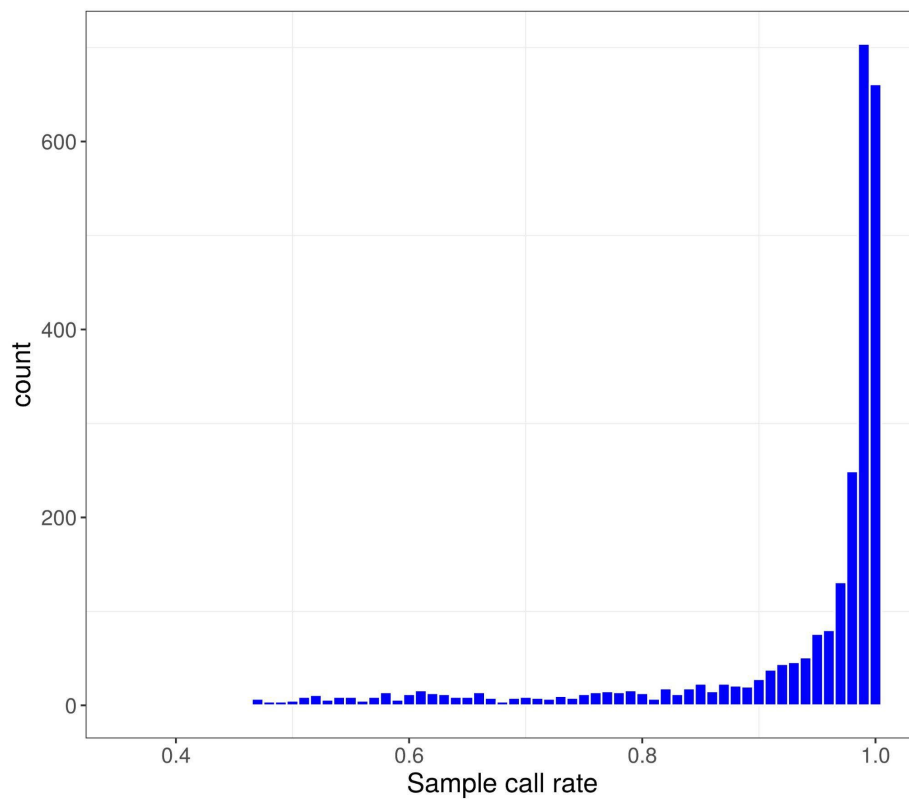

Note: only autosomal biallelic SNPs were used.
