# Supplementary material for: Cohort profile: Genetic data in the German Socio-Economic Panel Innovation Sample (SOEP-G)
Source: PubMed Central journal article supplement (PMC10686514; doi:10.1371/journal.pone.0294896), 2023-11-29

**S5 Fig.** Homozygosity / Heterozygosity outliers

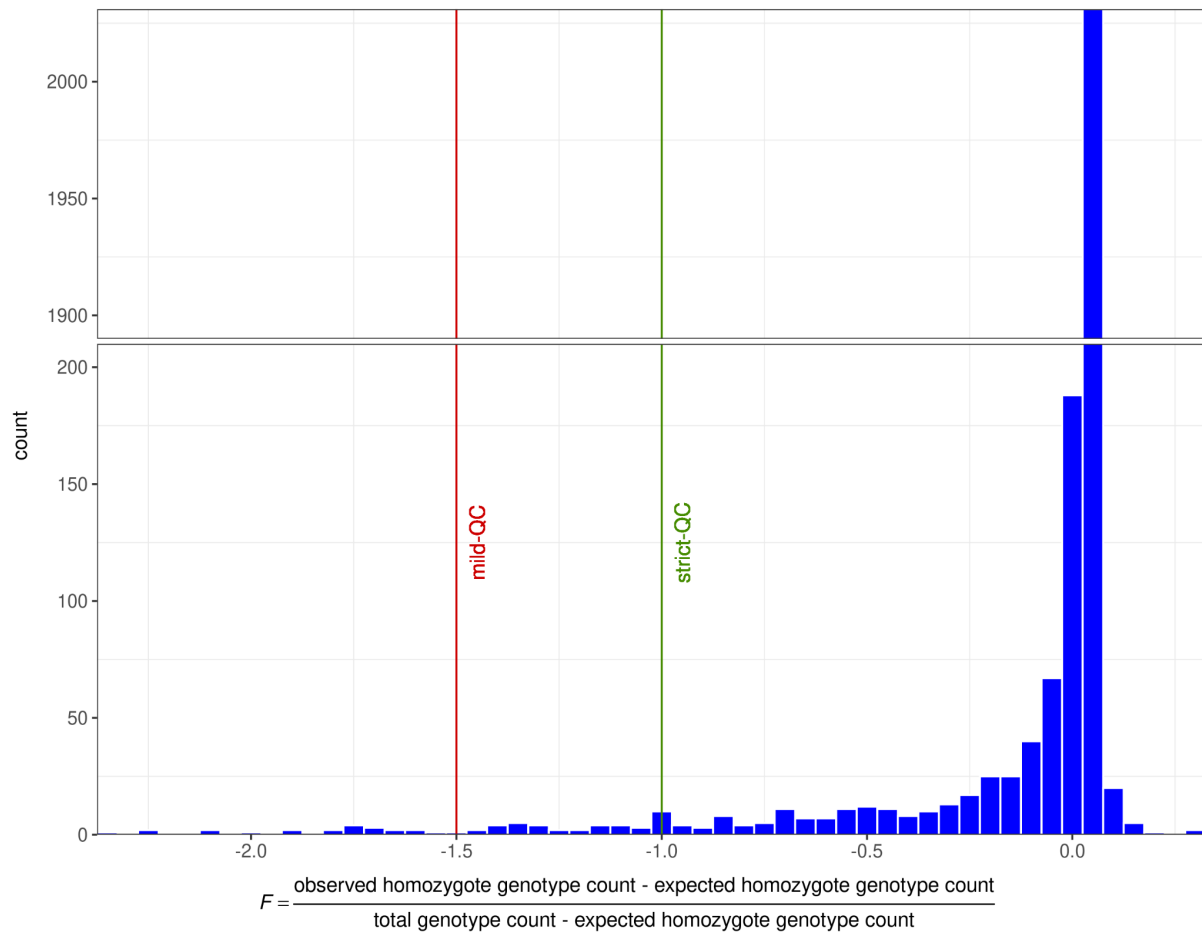

Supplement: pone.0294896.s005.pdf [file pone.0294896.s005.pdf]
