# Supplementary material for: Cohort profile: Genetic data in the German Socio-Economic Panel Innovation Sample (SOEP-G)
Source: PubMed Central journal article supplement (PMC10686514; doi:10.1371/journal.pone.0294896), 2023-11-29

S6 Fig. Pre-imputation (mild-)QC - Ancestry filtering

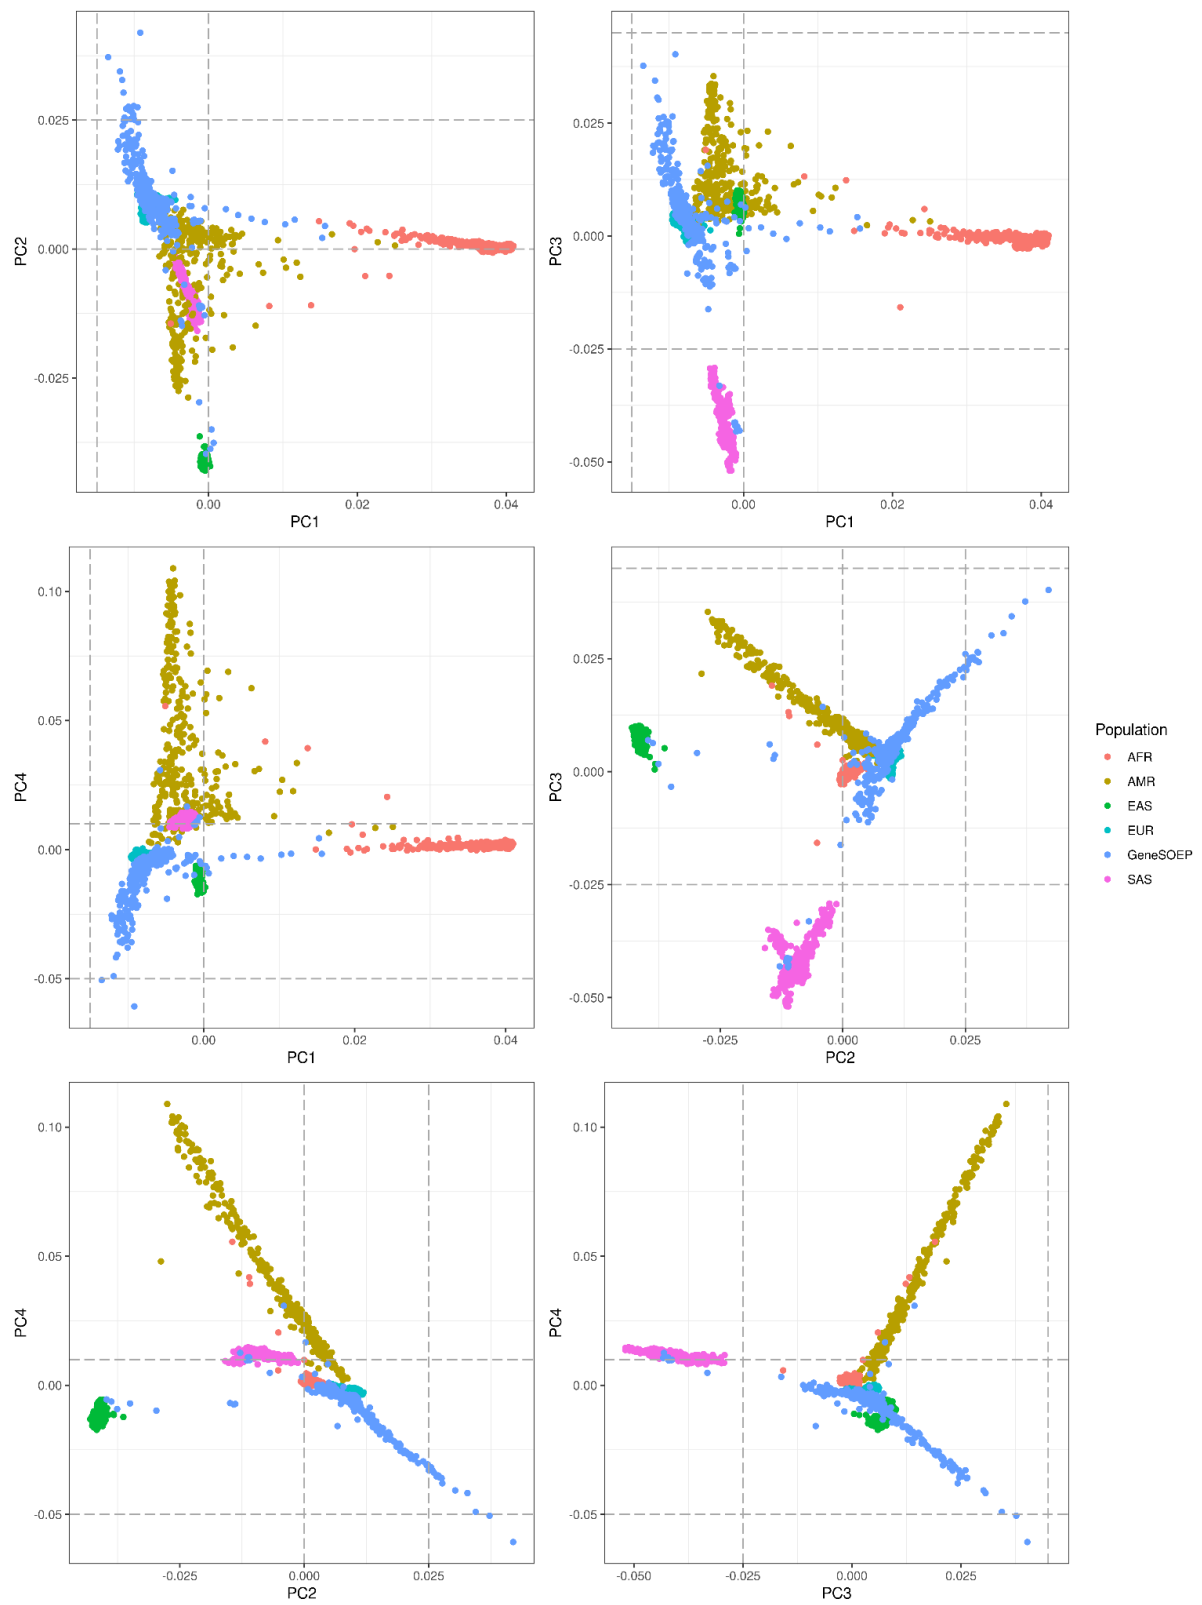

Supplement: pone.0294896.s006.pdf [file pone.0294896.s006.pdf]
