# Supplementary material for: Cohort profile: Genetic data in the German Socio-Economic Panel Innovation Sample (SOEP-G)
Source: PubMed Central journal article supplement (PMC10686514; doi:10.1371/journal.pone.0294896), 2023-11-29

S11 Fig. Post-imputation strict-QC - Ancestry filtering

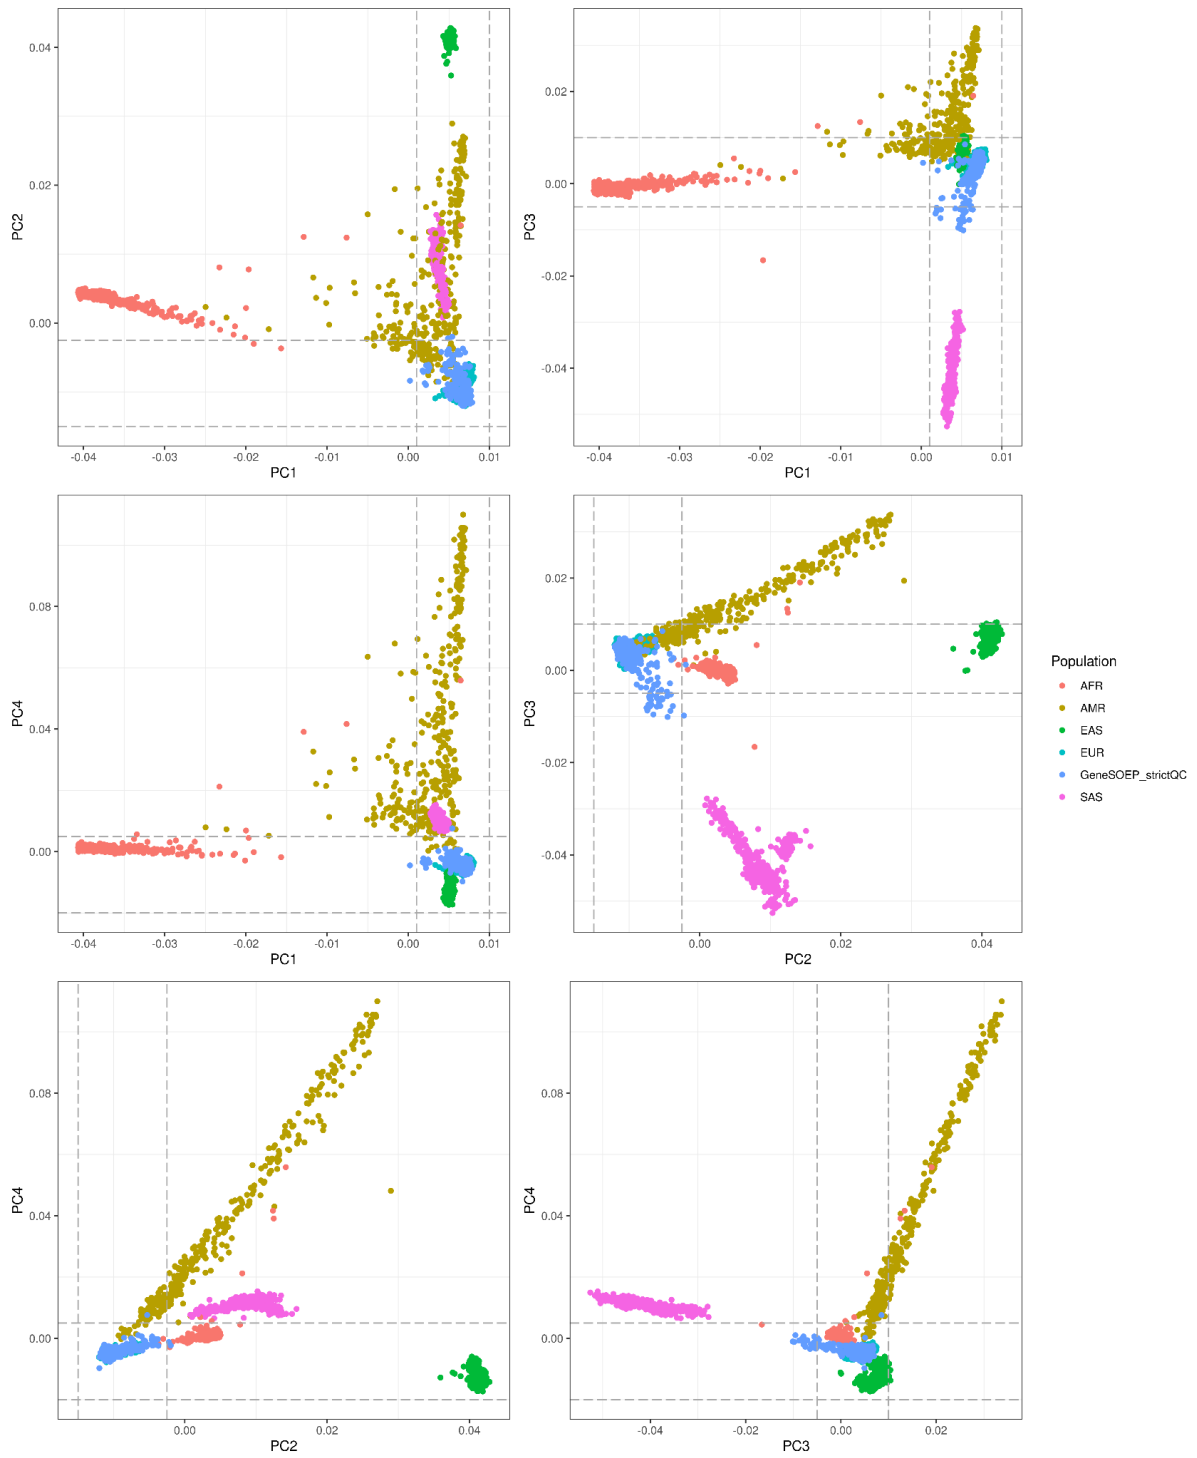

Supplement: pone.0294896.s011.pdf [file pone.0294896.s011.pdf]
